# Supplementary material
Source: HighWire-hosted journal article supplement (https://oem.bmj.com/content/75/7/507)
Supplement: inline-supplementary-material-1 [file inline-supplementary-material-1.pdf]

Update of an Occupational Asthma-specific Job-Exposure Matrix to assess exposure to 30 specific agents

Nicole Le Moual<sup>1,2</sup>, Jan-Paul Zock<sup>3,4,5</sup>, Orianne Dumas<sup>1,2</sup>, Theodore Lytras<sup>3,4</sup>, Eva Andersson<sup>6</sup>, Linnéa Lillienberg<sup>6</sup>, Vivi Schlünssen<sup>7</sup>, Geza Benke<sup>8</sup>, Hans Kromhout<sup>9</sup>

<sup>1</sup>Inserm, U1168, VIMA: Aging and chronic diseases. Epidemiological and public health approaches, F-94807, Villejuif, France

<sup>2</sup>Univ Versailles St-Quentin-en-Yvelines, UMR-S 1168, F-78180, Montigny Le Bretonneux, France

<sup>3</sup>Barcelona Institute of Global Health (ISGlobal), Barcelona, Spain

<sup>4</sup>Universitat Pompeu Fabra (UPF), Barcelona, Spain

<sup>5</sup>CIBER Epidemiología y Salud Pública (CIBERESP), Madrid, Spain

<sup>6</sup>Department of Occupational and Environmental Medicine, Sahlgrenska University Hospital, Gothenburg, Sweden

<sup>7</sup>Department of Public Health, Danish Ramazzini Centre, Aarhus University and National Research Center for the Working Environment, Copenhagen, Denmark

<sup>8</sup>Monash Centre for Occupation and Environmental Health, School of Public Health and Preventive Medicine, Monash University, Melbourne, Australia

<sup>9</sup>Department of Environmental Epidemiology, Institute for Risk Assessment Sciences, Utrecht University, Utrecht, the Netherlands

### **Correspondence**

Nicole Le Moual

Inserm U 1168 / VIMA

Aging and chronic diseases. Epidemiological and public health approaches.

16, avenue Paul Vaillant Couturier

94807 Villejuif Cedex, France

e-mail: [nicole.lemoual@inserm.fr](mailto:nicole.lemoual@inserm.fr)

Tel: 33 1 45 59 50 70

Fax: 33 1 45 59 51 69

## ONLINE SUPPLEMENT

Figure E1 – Summary of the principles of exposure evaluation by the Asthma-specific JEM

| Exposure estimate in yes (1) or no (0) for each ISCO-88 code |                                            |           |      |                                     |     |                      |
|--------------------------------------------------------------|--------------------------------------------|-----------|------|-------------------------------------|-----|----------------------|
| ISCO88 job codes                                             | 18 asthmagenic products (high probability) |           |      | 4 other exposures (Low asthma risk) |     | Expert re-evaluation |
|                                                              | (1)*                                       | (2) ° ... | (18) | (1) ...                             | (4) |                      |
| 5132, personal care workers                                  | 1                                          | 1 ...     | 0    | 0 ...                               | 0   | 0                    |
| 2221, doctors                                                | 0                                          | 0 ...     | 0    | 0 ...                               | 0   | 1                    |

\* Reactive cleaning /disinfecting products, ° latex

Job poorly defined or with heterogeneous exposure

YES

NO

Expert re-evaluation

Exposure attributed by the JEM to a given subject is checked by an expert

Estimate by job and ascribed to each subject with this job

This Asthma-specific JEM<sup>1</sup> is freely available on <http://asthmajem.vjf.inserm.fr/>

The Asthma-specific job-exposure matrix is a two dimensional table with a job axis made up by ISCO88 job codes and an agent axis consisting of eighteen categories of asthmagenic products and 4 products at low risk for asthma. Exposure is classified as yes or no exposed. In addition, jobs poorly defined or with heterogeneous exposures (out of 506 ISCO-88 job codes) were identified and classified as ‘expert re-evaluation step needed’ (yes/no) with linked comments and recommendations according to each specific exposure to review. The Expert re-evaluation is an important step and a strength of the method.

When applying the JEM to a study, for a given participant, each reported job code was classified as exposed (yes/no), for each specific exposure, and as ‘expert re-evaluation needed’ (yes/no). In the case of re-evaluation, the exposure attributed by the JEM is checked by an expert and modified if necessary by the expert directly at participant level after taking into account his corresponding job, industry and tasks descriptions (which is the case for doctors; ISCO88 code: 2221; instructions in the expert re-evaluation step : ‘recode latex=1 if surgeon). Personal care workers (code 5132) were classified as exposed to industrial cleaning products and latex. For this job, the expert step is not needed; exposure estimated for this job is ascribed to each subject with this job in the studied population.

**Table E1 – Description of main studies in respiratory or immunologically –related diseases in which the Asthma-specific JEM was applied**

| Study Europe                         | Published years          | Country                 | Design                                             | Expert re-evaluation | Asthma or respiratory -related phenotypes                              |                                                                |                                     | Healthy Worker Effect (HWE)        | Other diseases               |
|--------------------------------------|--------------------------|-------------------------|----------------------------------------------------|----------------------|------------------------------------------------------------------------|----------------------------------------------------------------|-------------------------------------|------------------------------------|------------------------------|
|                                      |                          |                         |                                                    |                      | Phenotypes                                                             | Exposure and disease                                           | Jobs and disease                    |                                    |                              |
| ECRHS I/ II <sup>2-6</sup>           | 2004; 2007; 2014; 2016   | Europe n= 1336 to 7077  | Population-based                                   | Yes                  | Asthma incidence<br>Rhinitis incidence<br>Asthma control               |                                                                | Cleaners, medical professions       | -                                  | -                            |
| EGEA I/ II <sup>1,3,7-14</sup>       | 2000; 2005; 2011 to 2016 | France n=376 to 689     | Case-control                                       | Yes                  | Current, severe, work- / non-work-related asthma<br>Biological markers | Highly reactive cleaning agents, irritants (low to high level) | Personal care workers               | Hire effect<br>Survivor effect     | -                            |
| PAARC <sup>15</sup>                  | 2004                     | France n=14151          | Population-based                                   | No                   | 4 asthma phenotypes such as ever and adult-onset                       | Highly reactive chemicals and cleaning agents                  | Cleaners<br>Personal care workers   | -                                  | -                            |
| B58C <sup>16,17</sup>                | 2011; 2013               | UK n= 5020 to 7406      | Population-based birth cohort                      | Yes                  | Adult-onset asthma                                                     | HMW, LMW, cleaning agents, irritants                           | Cleaning jobs                       | Job choices                        | -                            |
| RHINE <sup>18</sup>                  | 2014                     | Northern Europe n=13284 | Population-based                                   | Yes                  | New-onset atopic and non-atopic asthma                                 | LMW, cleaning agents, irritants (low to high level)            |                                     | -                                  | -                            |
| Estonian genome center <sup>19</sup> | 2014                     | Estonia n=34015         | Population-based                                   | No                   | 4 phenotypes (physician-diagnosed; current treated asthma ...)         | HMW (flour, animals)<br>Low/moderate level of irritants        | Cleaning jobs<br>Healthcare workers | -                                  | -                            |
| ISAAC/SOLAR <sup>20-24</sup>         | 2006; 2007               | Germany n=1416 to 2857  | Population-based                                   | No                   | Rhinitis<br>Atopic dermatitis<br>Allergy<br>Sensitisation              | LMW                                                            | -                                   | Job choices<br>Healthy hire effect | -                            |
| Lymphoma study <sup>25</sup>         | 2004                     | Spain n=1073            | Case-control                                       | Yes                  | -                                                                      | -                                                              | -                                   | -                                  | Hodgkin's and other lymphoma |
| Active Swedish workers <sup>26</sup> | 2008                     | Sweden n=3 million      | Cohort linked to national cancer, death registries | No                   | -                                                                      | -                                                              | -                                   | -                                  | Multiple myeloma             |
| Italian Study <sup>27</sup>          | 2009                     | Italy n=4061            | Multicenter case-control                           | Yes                  | -                                                                      | -                                                              | -                                   | -                                  | Hodgkin's and other lymphoma |
| Epilymph <sup>28</sup>               | 2013                     | Europe n=4501           | Case-control                                       | No                   | -                                                                      | -                                                              | -                                   | -                                  | Hodgkin's and other lymphoma |

Table E1 – Description of main studies in respiratory or immunologically –related diseases in which the Asthma-specific JEM was applied (continued)

| Study Outside Europe            | Published years | Country            | Design                                                              | Expert re-evaluation | Asthma or respiratory -related phenotypes  |                                          |                                           | Healthy Worker Effect (HWE) | Other diseases |
|---------------------------------|-----------------|--------------------|---------------------------------------------------------------------|----------------------|--------------------------------------------|------------------------------------------|-------------------------------------------|-----------------------------|----------------|
|                                 |                 |                    |                                                                     |                      | Phenotypes                                 | Exposure and disease                     | Jobs and disease                          |                             |                |
| Taiwan <sup>29</sup>            | 2010            | Taiwan<br>n=1512   | Case-control study                                                  | Yes                  | Atopic and non-atopic asthma               | HMW, LMW, cleaning agents                | -                                         | -                           | -              |
| Apprentice cohort <sup>30</sup> | 2009            | Canada<br>n=408    | Working in animal health, technology, pastry making, dental hygiene | Yes                  | Sensitization                              | HMW                                      | -                                         | -                           | -              |
| Apprentice cohort <sup>31</sup> | 2014            | Canada<br>n=202    | Car painting                                                        | No                   | incident work-related respiratory symptoms | Isocyanates                              | -                                         | -                           | -              |
| Clinical asthma <sup>32</sup>   | 2016            | Canada<br>n=179    | Asthmatics recruited at pulmonary clinics                           | No                   | work-related respiratory symptoms          | LMW                                      | trades, transport and equipment operators | -                           | -              |
| TAHS <sup>33</sup>              | 2013            | Australia<br>n=792 | Cohort of children (7 years old at baseline)                        | Yes                  | New onset-asthma                           | Latex<br>Highly reactive cleaning agents | Healthcare workers                        | -                           | -              |
| Clinical asthma <sup>34</sup>   | 2014            | Australia<br>n=66  | Refractory asthma                                                   | No                   | Biomarkers (neutrophils)                   | asthmagens                               | -                                         | -                           | -              |

ECRHS: European respiratory survey ; EGEA: Epidemiological study on genetic and environment of asthma; PAARC: pollution atmosphérique et affections respiratoires chroniques ; ISAAC : International Study of Asthma and Allergies in Childhood / SOLAR: Study on Occupational Allergy Risks; follow-up of participants from ISAAC; TAHS : Tasmanian Longitudinal Health Study;

These papers allow evaluating (1) efficiency and accuracy of the method<sup>1,4,8,15,30</sup>, (2) usefulness of the application of this method to study occupational exposures and asthma-related phenotypes among adults<sup>5,7,21,29</sup> and children<sup>35,36</sup>, healthy worker effect<sup>9,16,20</sup>, lymphoma immunologically-related diseases<sup>25,27</sup>, or (3) less specific topics<sup>37-46</sup>. In addition, (4) some papers have revised the Asthma-specific JEM by taking into account specificities of the country<sup>47-49</sup> or (5) use only the method to defined large groups of exposure<sup>50,51</sup>.

Table E2 - List of agents selected or excluded at each step - New Occupational Asthma-specific JEM

| Agents                                            | First step included | Second step excluded | Second step included | Last step excluded |
|---------------------------------------------------|---------------------|----------------------|----------------------|--------------------|
| Animals                                           | 1                   |                      |                      |                    |
| Fish/ Shellfish                                   | 1                   |                      |                      |                    |
| Flour                                             | 1                   |                      |                      |                    |
| Foods                                             | 1                   |                      |                      |                    |
| Plants-related dusts                              | 1                   |                      |                      |                    |
| Mites <sup>o</sup>                                | 1                   | 1                    |                      |                    |
| House dust Mites                                  |                     |                      | 1                    |                    |
| Storage Mites                                     |                     |                      | 1                    |                    |
| Plant Mites                                       |                     |                      | 1                    |                    |
| Enzymes                                           | 1                   |                      |                      |                    |
| Latex                                             | 1                   |                      |                      |                    |
| Textile                                           | 1                   |                      |                      |                    |
| Moulds                                            | 1                   |                      |                      |                    |
| <i>Bacteria*</i>                                  | <i>1</i>            |                      |                      | <i>1</i>           |
| Endotoxin                                         | 1                   |                      |                      |                    |
| Drugs                                             | 1                   |                      |                      |                    |
| <i>Highly reactive chemicals<sup>§</sup></i>      | <i>1</i>            | <i>1</i>             |                      |                    |
| High level chemical disinfectants                 | 1                   |                      |                      |                    |
| Aliphatic Amines                                  | 1                   |                      |                      |                    |
| Isocyanates                                       | 1                   |                      |                      |                    |
| Acrylates                                         | 1                   |                      |                      |                    |
| Epoxy resins                                      | 1                   |                      |                      |                    |
| Persulphates/Henna                                | 1                   |                      |                      |                    |
| Wood #                                            | 1                   |                      |                      |                    |
| Metal                                             | 1                   |                      |                      |                    |
| Metal Working Fluids                              | 1                   |                      |                      |                    |
| <i>Irritants peaks*</i>                           | <i>1</i>            |                      |                      | <i>1</i>           |
| Herbicides                                        |                     |                      | 1                    |                    |
| Insecticides                                      |                     |                      | 1                    |                    |
| Fungicides                                        |                     |                      | 1                    |                    |
| Indoor cleaning                                   | 1                   |                      |                      |                    |
| Bleach                                            | 1                   |                      |                      |                    |
| Organic Solvents                                  | 1                   |                      |                      |                    |
| Exhaust fumes                                     | 1                   |                      |                      |                    |
| <i>Environmental Tobacco smoke*</i>               | <i>1</i>            |                      |                      | <i>1</i>           |
| <i>Dusts, gases, fumes in general<sup>§</sup></i> | <i>1</i>            | <i>1</i>             |                      |                    |

<sup>o</sup> The category mites was split in three sub-categories : house dusts, storage, plant

<sup>§</sup> Highly reactive chemical was excluded from the list but considered as a large group; Dusts, gases, fumes was excluded as may be evaluated in each study from all other exposures evaluation of the OAsJEM

\* Exposure categories excluded at last step by consensus with all experts – the experts believed that these specific exposures are too difficult to evaluate by a JEM (not optimal) – Bacteria was excluded because too close to endotoxin evaluation (same exposure coding)

# All kind of wood as significant associations were suggested with several wood-related jobs, not only for antigenic wood (e.g. western red cedar)<sup>52-54</sup>

Table E3- Examples of evaluation at various steps – Latex

| ISCO-88 | Standard description                  | Exposure level *      |                           | Expert re-evaluation step of exposure (no/yes) |
|---------|---------------------------------------|-----------------------|---------------------------|------------------------------------------------|
|         |                                       | 0:no<br><i>Step 1</i> | 1:medium<br><i>Step 2</i> |                                                |
| 2212    | Pharmacologists, pathologists         | 1/1/1                 | -                         | No                                             |
| 2220    | Health professionals (except nursing) | 1/2/1                 | 1                         | Yes                                            |
| 2221    | Medical doctors                       | 1/2/2                 | 1                         | Yes                                            |
| 2224    | Pharmacists                           | 1/1/0                 | 1                         | No                                             |
| 2230    | Nursing and midwifery professionals   | 2/2/2                 | -                         | Yes                                            |

\* Exposure level evaluated by each expert: expert 1/ expert 2/ expert 3 Consistent evaluation of exposure by the 3 experts at step 1 → final decision (step 2: -)

In case of disagreement between the 3 experts regarding evaluation of exposure at step 1, the final decision was taken by consensus at step 2: in the 3 examples above, experts decided to classified these jobs with medium exposure (1) at step2.

Table E4- Examples of recommendations for medical work with high exposure to latex

| ISCO-88 | Standard description                | Verification |          | Recommendation<br>Comments for the expert re-evaluation step (exposure)                                                                                                                                                                                                                                                                                                                                                                                                                                                                                                  |
|---------|-------------------------------------|--------------|----------|--------------------------------------------------------------------------------------------------------------------------------------------------------------------------------------------------------------------------------------------------------------------------------------------------------------------------------------------------------------------------------------------------------------------------------------------------------------------------------------------------------------------------------------------------------------------------|
|         |                                     | ISCO         | Exposure |                                                                                                                                                                                                                                                                                                                                                                                                                                                                                                                                                                          |
| 2221    | Medical doctors                     | 0            | 1        | <b>recode latex=2</b> if surgeon or <u>clear evidence</u> of use of latex gloves, <b>recode latex=0</b> if <u>clear evidence of no use of latex gloves (e.g. &gt; 2000 or &lt; 1975)</u> otherwise <b>keep 1</b> - take into account time axis, workers were considered exposed between 1975-2000 (especially in operating room; less risk as few powdered gloves after 1995-2000 and no latex gloves before 1975-1980, according to countries)                                                                                                                          |
| 2230    | Nursing and midwifery professionals | 0            | 1        | <b>recode latex=0</b> for nurses not based in hospitals (eg. public health nurse, district nurse, nurse in school, occupational health nurse, research nurse, nurse educator etc.); <b>recode latex=0</b> if <u>clear evidence of no use</u> of latex gloves (e.g. > 2000) - take into account time axis, workers were considered exposed between 1975-2000 (especially in operating room; less risk as few powdered gloves after 1995-2000 according to countries, no latex gloves before 1975-1980); <b>keep latex=2</b> for midwives, <b>otherwise recode latex=1</b> |

Table E5 - Examples of jobs classified at high exposure level

| <b>Agents</b>                     | <b>n*</b> | <b>Examples of ISCO88 Jobs- labels</b>                                                                                                                     |
|-----------------------------------|-----------|------------------------------------------------------------------------------------------------------------------------------------------------------------|
| Animals                           | 6         | 2223- Veterinarians; 6121- Dairy and livestock producers; 6122- Poultry producers                                                                          |
| Fish/ Shellfish                   | 4         | 6152- Inland and coastal waters fishery/ workers; 6153- Deep-sea fishery workers; 9213- Fishery, hunting and trapping labourers                            |
| Flour                             | 2         | 7412- Bakers, pastry-cooks and confectionery makers; 8273- Grain- and spice-milling-machine operators                                                      |
| Foods                             | 1         | 8272- Dairy-products machine operators                                                                                                                     |
| Plants-related dusts              | 3         | 6111- Field crop and vegetable growers; 6113- Gardeners, horticultural and nursery growers; 8273- Grain- and spice-milling-machine operators               |
| House dust Mites                  | 1         | 9131- Domestic helpers and cleaners                                                                                                                        |
| Storage Mites                     | 0         |                                                                                                                                                            |
| Plant Mites                       | 2         | 6111- Field crop and vegetable growers; 6113- Gardeners, horticultural and nursery growers                                                                 |
| Enzymes                           | 0         |                                                                                                                                                            |
| Latex                             | 6         | 2222- Dentists; 2223- Veterinarians; 2230- Nursing and midwifery professionals                                                                             |
| Textile                           | 3         | 7431- Fibre preparers; 8261- Fibre-preparing-, spinning- and winding machine operators; 8262- Weaving- and knitting-machine operators                      |
| Moulds                            | 3         | 6122- Poultry producers; 6124- Mixed-animal producers; 9161- Garbage collectors                                                                            |
| Endotoxin                         | 8         | 6121- Dairy and livestock producers; 6122- Poultry producers; 6124- Mixed-animal producers; 6130- Market-oriented crop and animal producers                |
| Drugs                             | 2         | 3227- Veterinary assistants; 3228- Pharmaceutical assistants                                                                                               |
| High level chemical disinfectants | 3         | 6121- Dairy and livestock producers; 6122- Poultry producers; 7411- Butchers, fishmongers and related food preparers                                       |
| Aliphatic Amines                  | 3         | 7223- Machine-tool setters and setter-operators; 7224- Metal wheel-grinders, polishers and tool sharpeners                                                 |
| Isocyanates                       | 1         | 7142- Varnishers and related painters                                                                                                                      |
| Acrylates                         | 0         |                                                                                                                                                            |
| Epoxy resins                      | 4         | 7132- Floor layers and tile setters ; 7142- Varnishers and related painters ; 7231- Motor vehicle mechanics and fitters                                    |
| Persulphates/Henna                | 1         | 5141- Hairdressers, barbers, beauticians and related workers                                                                                               |
| Wood                              | 5         | 7422- Cabinet makers and related workers; 7423- Woodworking machine setters and setter-operators; 8141- Wood-processing-plant operators                    |
| Metal                             | 7         | 7211- Metal moulders and coremakers; 7212- Welders and flamecutters ; 8121- Ore and metal furnace operators                                                |
| Metal Working Fluids              | 5         | 7222- Tool-makers, related workers; 7223- Machine-tool setters, setter-operators; 8211- Machine-tool operators                                             |
| Herbicides                        | 7         | 6111- Field crop and vegetable growers; 6112- Tree and shrub crop growers ; 9212- Forestry labourers                                                       |
| Insecticides                      | 9         | 6111- Field crop and vegetable growers; 6112- Tree and shrub crop growers; 6113- Gardeners, horticultural and nursery growers;                             |
| Fungicides                        | 9         | 6111- Field crop and vegetable growers; 6112- Tree and shrub crop growers; 7421- Wood treaters                                                             |
| Indoor cleaning                   | 3         | 5132- Institution-based personal care workers; 9131- Domestic helpers and cleaners; 9132- Helpers and cleaners in offices, hotels and other establishments |
| Bleach                            | 2         | 5132- Institution-based personal care workers; 9131- Domestic helpers and cleaners                                                                         |
| Organic Solvents                  | 13        | 5141- Hairdressers, barbers, beauticians and related workers; 7141- Painters and related workers; 7341- Compositors, typesetters                           |
| Exhaust fumes                     | 13        | 3141- Ships' engineers; 5161- Fire-fighters; 7111- Miners and quarry workers                                                                               |

\* Number of jobs classified with 'high exposure level' for each agent. Jobs classified at medium exposure levels were not indicated in the Table.

Table E6 – Percentage of jobs classified exposed or with an expert re-evaluation - 4-digit ISCO-88 jobs (n=390)

| Agents                             | Exposure level, %* |           | Expert re-evaluation, %* |
|------------------------------------|--------------------|-----------|--------------------------|
|                                    | Medium or High     | High only |                          |
| Animals                            | 3.6                | 1.3       | 3.1                      |
| Fish/shellfish                     | 2.3                | 1.0       | 1.8                      |
| Flour                              | 0.8                | 0.5       | 1.0                      |
| Foods                              | 1.3                | 0.3       | 1.8                      |
| Plants-related dusts               | 3.8                | 0.8       | 4.4                      |
| House dust mites                   | 0.8                | 0.3       | 1.3                      |
| Storage mites                      | 3.3                | 0.0       | 0.5                      |
| Plant mites                        | 3.1                | 0.5       | 3.6                      |
| Enzymes                            | 1.3                | 0.0       | 1.8                      |
| Latex                              | 4.4                | 1.3       | 4.9                      |
| Textile                            | 3.6                | 0.8       | 3.6                      |
| Moulds                             | 6.4                | 0.8       | 2.6                      |
| Endotoxin                          | 5.6                | 1.8       | 3.8                      |
| Drugs                              | 1.5                | 0.5       | 2.3                      |
| High level chemicals disinfectants | 8.5                | 0.8       | 4.6                      |
| Aliphatic Amines                   | 2.3                | 0.5       | 4.1                      |
| Isocyanates                        | 1.5                | 0.3       | 2.3                      |
| Acrylates                          | 2.3                | 0.0       | 3.8                      |
| Epoxy resins                       | 2.1                | 1.0       | 2.1                      |
| Persulphates/Henna                 | 0.3                | 0.3       | 0.0                      |
| Wood                               | 3.8                | 1.0       | 1.8                      |
| Metal                              | 9.7                | 1.5       | 8.5                      |
| Metal Working Fluids               | 2.1                | 1.0       | 1.5                      |
| Herbicides                         | 2.6                | 1.3       | 1.5                      |
| Insecticides                       | 3.6                | 1.5       | 2.1                      |
| Fungicides                         | 3.6                | 1.5       | 1.0                      |
| Indoor cleaning                    | 4.4                | 0.8       | 1.8                      |
| Bleach                             | 2.6                | 0.5       | 1.8                      |
| Organic solvents                   | 19.0               | 2.8       | 5.1                      |
| Exhaust fumes                      | 11.5               | 2.8       | 5.9                      |

\* percentage of jobs classified exposed at high or medium level and at high level out of 390 4-digit ISCO-88 jobs.



## REFERENCES

1. Kennedy SM, Le Moual N, Choudat D, Kauffmann F. Development of an asthma specific job exposure matrix and its application in the epidemiological study of genetics and environment in asthma (EGEA). *Occup Environ Med.* 2000;57:635-641, available from: <http://asthmajem.vjf.inserm.fr/>. Date last accessed: 30 April, 2017.
2. Le Moual N, Carsin AE, Siroux V, et al. Occupational exposures and uncontrolled adult-onset asthma in the ECRHS II. *Eur Respir J.* 2014;43(2):374-386.
3. Rava M, Ahmed I, Kogevinas M, et al. Genes Interacting with Occupational Exposures to Low Molecular Weight Agents and Irritants on Adult-Onset Asthma in Three European Studies. *Environ. Health Perspect.* 2017;125(2):207-214.
4. Zock JP, Cavalle N, Kromhout H, et al. Evaluation of specific occupational asthma risks in a community-based study with special reference to single and multiple exposures. *J. Expo. Anal. Environ. Epidemiol.* 2004;14(5):397-403.
5. Kogevinas M, Zock JP, Jarvis D, et al. Exposure to substances in the workplace and new-onset asthma: an international prospective population-based study (ECRHS-II). *Lancet.* 2007;370(9584):336-341.
6. Radon K, Gerhardinger U, Schulze A, et al. Occupation and adult onset of rhinitis in the general population. *Occup. Environ. Med.* 2008;65(1):38-43.
7. Le Moual N, Siroux V, Pin I, Kauffmann F, Kennedy SM, on behalf of the Epidemiological Study on the Genetics and Environment of Asthma. Asthma severity and exposure to occupational asthrogens. *Am J Respir Crit Care Med.* 2005;172(4):440-445.
8. Dumas O, Donnay C, Heederik DJ, et al. Occupational exposure to cleaning products and asthma in hospital workers. *Occup. Environ. Med.* 2012;69(12):883-889.
9. Dumas O, Smit LA, Pin I, et al. Do young adults with childhood asthma avoid occupational exposures at first hire? *Eur. Respir. J.* 2011;37(5):1043-1049.
10. Dumas O, Le Moual N, Siroux V, et al. Work related asthma. A causal analysis controlling the healthy worker effect. *Occup. Environ. Med.* 2013;70:603-610.
11. Dumas O, Siroux V, Luu F, et al. Cleaning and asthma characteristics in women. *Am. J. Ind. Med.* 2014;57(3):303-311.
12. Jeebhay MF, Ngajilo D, le Moual N. Risk factors for nonwork-related adult-onset asthma and occupational asthma: a comparative review. *Curr. Opin. Allergy Clin. Immunol.* 2014;14(2):84-94.
13. Smit LA, Strachan DP, Vermeulen R, et al. Human leukocyte antigen class II variants and adult-onset asthma: does occupational allergen exposure play a role? *Eur. Respir. J.* 2014;44(5):1234-1242.
14. Dumas O, Matran R, Zerimech F, et al. Occupational exposures and fluorescent oxidation products in 723 adults of the EGEA study. *Eur. Respir. J.* 2015;46(1):258-261.
15. Le Moual N, Kennedy SM, Kauffmann F. Occupational exposures and asthma in 14,000 adults from the general population. *Am J Epidemiol.* 2004;160(11):1108-1116.
16. Butland BK, Ghosh R, Strachan DP, Cullinan P, Jarvis D. Job choice and the influence of prior asthma and hay fever. *Occup. Environ. Med.* 2011;68(7):494-501.
17. Ghosh RE, Cullinan P, Fishwick D, et al. Asthma and occupation in the 1958 birth cohort. *Thorax.* 2013;68(4):365-371.
18. Lillienberg L, Dahlman-Hoglund A, Schioler L, Toren K, Andersson E. Exposures and asthma outcomes using two different job exposure matrices in a general population study in northern Europe. *Ann. Occup. Hyg.* 2014;58(4):469-481.
19. Dumas O, Laurent E, Bousquet J, et al. Occupational irritants and asthma: an Estonian cross-sectional study of 34,000 adults. *Eur Respir J.* 2014;44:647-656.
20. Radon K, Huemmer S, Dressel H, et al. Do respiratory symptoms predict job choices in teenagers? *Eur Respir J.* 2006;27(4):774-778.
21. Riu E, Dressel H, Windstetter D, et al. First months of employment and new onset of rhinitis in adolescents. *Eur Respir J.* 2007;30(3):549-555.

22. Peters AS, Kellberger J, Vogelberg C, et al. Prediction of the incidence, recurrence, and persistence of atopic dermatitis in adolescence: a prospective cohort study. *J. Allergy Clin. Immunol.* 2010;126(3):590-595 e591-593.
23. Heinrich S, Peters A, Kellberger J, et al. Study on occupational allergy risks (SOLAR II) in Germany: design and methods. *BMC Public Health.* 2011;11:298.
24. Kellberger J, Peters-Weist AS, Heinrich S, et al. Predictors of work-related sensitisation, allergic rhinitis and asthma in early work life. *Eur. Respir. J.* 2014;44(3):657-665.
25. Kogevinas M, Zock JP, Alvaro T, et al. Occupational exposure to immunologically active agents and risk for lymphoma. *Cancer Epidemiol Biomarkers Prev.* 2004;13(11 Pt 1):1814-1818.
26. Lope V, Perez-Gomez B, Aragonés N, et al. Occupation, exposure to chemicals, sensitizing agents, and risk of multiple myeloma in Sweden. *Cancer Epidemiol. Biomarkers Prev.* 2008;17(11):3123-3127.
27. Mirabelli MC, Zock JP, d'Errico A, et al. Occupational exposure to high molecular weight allergens and lymphoma risk among Italian adults. *Cancer Epidemiol Biomarkers Prev.* 2009;18(10):2650-2654.
28. Espinosa A, Zock JP, Benavente Y, et al. Occupational exposure to immunologically active agents and risk for lymphoma: the European Epilymph case-control study. *Cancer Epidemiol.* 2013;37(4):378-384.
29. Wang TN, Lin MC, Wu CC, et al. Risks of exposure to occupational asthmagens in atopic and nonatopic asthma: a case-control study in Taiwan. *Am. J. Respir. Crit. Care Med.* 2010;182(11):1369-1376.
30. Suarathana E, Heederik D, Ghezzi H, Malo JL, Kennedy SM, Gautrin D. Risks for the development of outcomes related to occupational allergies: an application of the asthma-specific job exposure matrix compared with self-reports and investigator scores on job-training-related exposure. *Occup Environ Med.* 2009;66(4):256-263.
31. Saab L, Gautrin D, Lavoue J, Suarathana E. Postapprenticeship isocyanate exposure and risk of work-related respiratory symptoms using an asthma-specific job exposure matrix, self-reported and expert-rated exposure estimates. *J. Occup. Environ. Med.* 2014;56(2):125-127.
32. Sadeghniaat-Haghighi K, Aminian O, Najafi A, et al. Work-related exacerbation of asthma among adults treated by pulmonary specialists. *Arch. Environ. Occup. Health.* 2016;71(1):35-42:0.
33. Hoy RF, Burgess JA, Benke G, et al. Occupational exposures and the development of new-onset asthma: a population-based cohort study from the ages of 13 to 44 years. *J. Occup. Environ. Med.* 2013;55(3):235-239.
34. Simpson JL, Guest M, Boggess MM, Gibson PG. Occupational exposures, smoking and airway inflammation in refractory asthma. *BMC Pulm. Med.* 2014;14:207.
35. Christensen BH, Thulstrup AM, Hougaard KS, et al. Maternal occupational exposure to asthmagens during pregnancy and risk of asthma in 7-year-old children: a cohort study. *BMJ Open.* 2013;11;3(4).
36. Christensen BH, Thulstrup AM, Hougaard KS, Skadhauge LR, Hansen KS, Schlunssen V. Occupational exposure during pregnancy and the risk of hay fever in 7-year-old children. *Clin Respir J.* 2013;7(2):183-188.
37. McHugh MK, Symanski E, Pompeii LA, Delclos GL. The feasibility of adapting a population-based asthma-specific job exposure matrix (JEM) to NHANES. *Am. J. Ind. Med.* 2010;53(12):1220-1224.
38. Cherry N, Beach J, Burstyn I, Fan X, Guo N, Kapur N. Data linkage to estimate the extent and distribution of occupational disease: new onset adult asthma in Alberta, Canada. *Am. J. Ind. Med.* 2009;52(11):831-840.
39. Liu J, Gustafson P, Cherry N, Burstyn I. Bayesian analysis of a matched case-control study with expert prior information on both the misclassification of exposure and the exposure-disease association. *Stat. Med.* 2009;28(27):3411-3423.

40. Beach J, Burstyn I, Cherry N. Estimating the extent and distribution of new-onset adult asthma in British Columbia using frequentist and Bayesian approaches. *Ann. Occup. Hyg.* 2012;56(6):719-727.
41. Singer AB, Burstyn I, Thygesen M, Mortensen PB, Fallin MD, Schendel DE. Parental exposures to occupational asthmagens and risk of autism spectrum disorder in a Danish population-based case-control study. *Environ. Health.* 2017;16(1):31.
42. Singer AB, Windham GC, Croen LA, et al. Maternal Exposure to Occupational Asthmagens During Pregnancy and Autism Spectrum Disorder in the Study to Explore Early Development. *J. Autism Dev. Disord.* 2016;46(11):3458-3468.
43. Thilising T, Rasmussen J, Lange B, Kjeldsen AD, Al-Kalemji A, Baelum J. Chronic rhinosinusitis and occupational risk factors among 20- to 75-year-old Danes-A GA(2) LEN-based study. *Am. J. Ind. Med.* 2012;55(11):1037-1043.
44. Burstyn I, Slutsky A, Lee DG, Singer AB, An Y, Michael YL. Beyond crosswalks: reliability of exposure assessment following automated coding of free-text job descriptions for occupational epidemiology. *Ann. Occup. Hyg.* 2014;58(4):482-492.
45. Lindstrom I, Suojalehto H, Pallasaho P, et al. Middle-aged men with asthma since youth: the impact of work on asthma. *J. Occup. Environ. Med.* 2013;55(8):917-923.
46. Larsen AD, Schlunssen V, Christensen BH, et al. Exposure to psychosocial job strain during pregnancy and odds of asthma and atopic dermatitis among 7-year old children - a prospective cohort study. *Scand. J. Work. Environ. Health.* 2014;40(6):639-648.
47. Lillienberg L, Andersson E, Janson C, et al. Occupational exposure and new-onset asthma in a population-based study in Northern Europe (RHINE). *Ann. Occup. Hyg.* 2013;57(4):482-492.
48. Tagiyeva N, Devereux G, Semple S, et al. Parental occupation is a risk factor for childhood wheeze and asthma. *Eur. Respir. J.* 2010;35(5):987-993.
49. Tagiyeva N, Teo E, Fielding S, Devereux G, Semple S, Douglas G. Occupational exposure to asthmagens and adult onset wheeze and lung function in people who did not have childhood wheeze: A 50-year cohort study. *Environ Int.* 2016;94:60-68.
50. Crewe J, Carey R, Glass D, et al. A comprehensive list of asthmagens to inform health interventions in the Australian workplace. *Aust. N. Z. J. Public Health.* 2016;40(2):170-173.
51. Fritschi L, Crewe J, Darcey E, et al. The estimated prevalence of exposure to asthmagens in the Australian workforce, 2014. *BMC Pulm. Med.* 2016;16:48.
52. Tarlo SM, Lemiere C. Occupational asthma. *N. Engl. J. Med.* 2014;370(7):640-649.
53. Schlunssen V, Sigsgaard T, Raulf-Heimsoth M, Kespohl S. Workplace exposure to wood dust and the prevalence of wood-specific sensitization. *Allergologie, Jahrgang.* 2012;35:402-412.
54. Quirce S, Bernstein JA. Old and new causes of occupational asthma. *Immunol. Allergy Clin. North Am.* 2011;31(4):677-698, v.
